# Supplementary material
Source: PubMed Central journal article supplement (PMC5010776)

## Supplementary Online Content

Lee JH, Cheng R, Vardarajan B, et al. Genetic modifiers of age at onset in carriers of the G206A mutation in *PSEN1* with familial Alzheimer disease among Caribbean Hispanics. *JAMA Neurol*. Published online July 27, 2015. doi:10.1001/jamaneurol.2015.1424.

**eTable 1.** Demographic and Clinical Characteristics of Participants in the Combined Late Onset Alzheimer Disease GWAS Datasets of Caribbean Hispanics\*

**eTable 2.** Allelic Association Using Linear Mixed Model: Affecteds-Only Analysis

**eFigure 1.** Study Design Flow Chart

**eFigure 2.** Next-Generation Sequencing

**eFigure 3.** LD Flanking the Variant From the Original Discovery Set for *SORBS2* and *SH3RF3*

This supplementary material has been provided by the authors to give readers additional information about their work.

**eTable 1.** Demographic and Clinical Characteristics of Participants in the Combined Late Onset Alzheimer Disease GWAS Datasets of Caribbean Hispanics\*

|                                                     |          |            |         |            |         |           |         |           |
|-----------------------------------------------------|----------|------------|---------|------------|---------|-----------|---------|-----------|
| Number of subjects sequenced/genotyped <sup>+</sup> | 2888     |            | 1062    |            | 763     |           | 1063    |           |
| Number of families                                  |          |            | 1062    |            | 196     |           | 1063    |           |
| Affection status                                    |          |            |         |            |         |           |         |           |
| Affected                                            | 1473     | 0.5        | 529     | 0.5        | 497     | 0.7       | 447     | 0.4       |
| Unaffected                                          | 1408     | 0.5        | 532     | 0.5        | 265     | 0.3       | 611     | 0.6       |
| Unknown                                             | 6        | 0.0        | 1       | 0.0        | 1       | 0.0       | 5       | 0.0       |
| Proportion of males: females                        | 970:1918 | 33.6:66.4  | 323:739 | 30.4:69.6  | 287:476 | 37.6:62.4 | 360:703 | 33.9:66.1 |
| Age                                                 |          |            |         |            |         |           |         |           |
| Age at onset or age at last examination             |          | 74.0±10.01 |         | 78.8±10.19 |         | 71.7±9.82 |         | 72.8±8.54 |
| Education                                           |          | 5.7±4.73   |         | 6.4±4.68   |         | 5.8±4.93  |         | 5.1±4.54  |
| APOE frequency                                      |          |            |         |            |         |           |         |           |
| E4                                                  | 1238     | 23.0%      | 379     | 17.8%      | 452     | 29.7%     | 407     | 23.5%     |
| E3                                                  | 3849     | 71.5%      | 1599    | 75.3%      | 1021    | 66.9%     | 1229    | 71.0%     |
| E2                                                  | 293      | 5.5%       | 146     | 6.9%       | 51      | 3.4%      | 96      | 5.5%      |

\*Three different batches of Caribbean Hispanic GWAS datasets were used.

**eTable 2.** Allelic Association Using Linear Mixed Model: Affecteds-Only Analysis

| Cyto                                     | Gene    | SNP        | Location (bp) | A1 | A2 | EOAD*  |          | LOAD**    |             |
|------------------------------------------|---------|------------|---------------|----|----|--------|----------|-----------|-------------|
|                                          |         |            |               |    |    | Beta   | P        | # of SNPs | p gene-wise |
| <b>Linkage signal</b>                    |         |            |               |    |    |        |          |           |             |
| 4q35                                     | STOX2   | rs28411264 | 184,908,447   | G  | A  | 13.20  | 0.05257  | 12        | 0.81696     |
| 4q35                                     | ENPP6   | rs13147555 | 185,074,686   | C  | A  | -7.49  | 0.02959  | 28        | 0.23342     |
| 4q35                                     | MLF1IP  | rs1401359  | 185,640,216   | C  | T  | -7.58  | 0.05502  | 58        | 0.09760     |
| 4q35                                     | SNX25   | rs11730401 | 186,268,129   | G  | A  | 8.83   | 0.00120  | 17        | 2.63E-06    |
| 4q35                                     | PDLIM3  | rs28522047 | 186,446,018   | G  | T  | -11.37 | 0.18390  | 13        | 0.00532     |
| 4q35                                     | SORBS2  | rs13130022 | 186,678,161   | C  | T  | 14.26  | 0.00033  | 143       | 0.00313     |
| 4q35                                     | FAM149A | rs2276920  | 187,078,938   | A  | G  | 7.24   | 0.02793  | 14        | 0.17919     |
| <b>Association signals</b>               |         |            |               |    |    |        |          |           |             |
| 2q13                                     | SH3RF3  | rs6542814  | 109,928,460   | A  | T  | 9.43   | 0.00276  | 157       | 0.00197     |
| 2q13                                     | NPHP1   | rs906815   | 110,942,496   | A  | G  | -13.09 | 4.13E-06 | 12        | 0.01430     |
| * Exome sequencing, ** GWAS of Hispanics |         |            |               |    |    |        |          |           |             |

**eFigure 1.** Study Design Flow Chart.

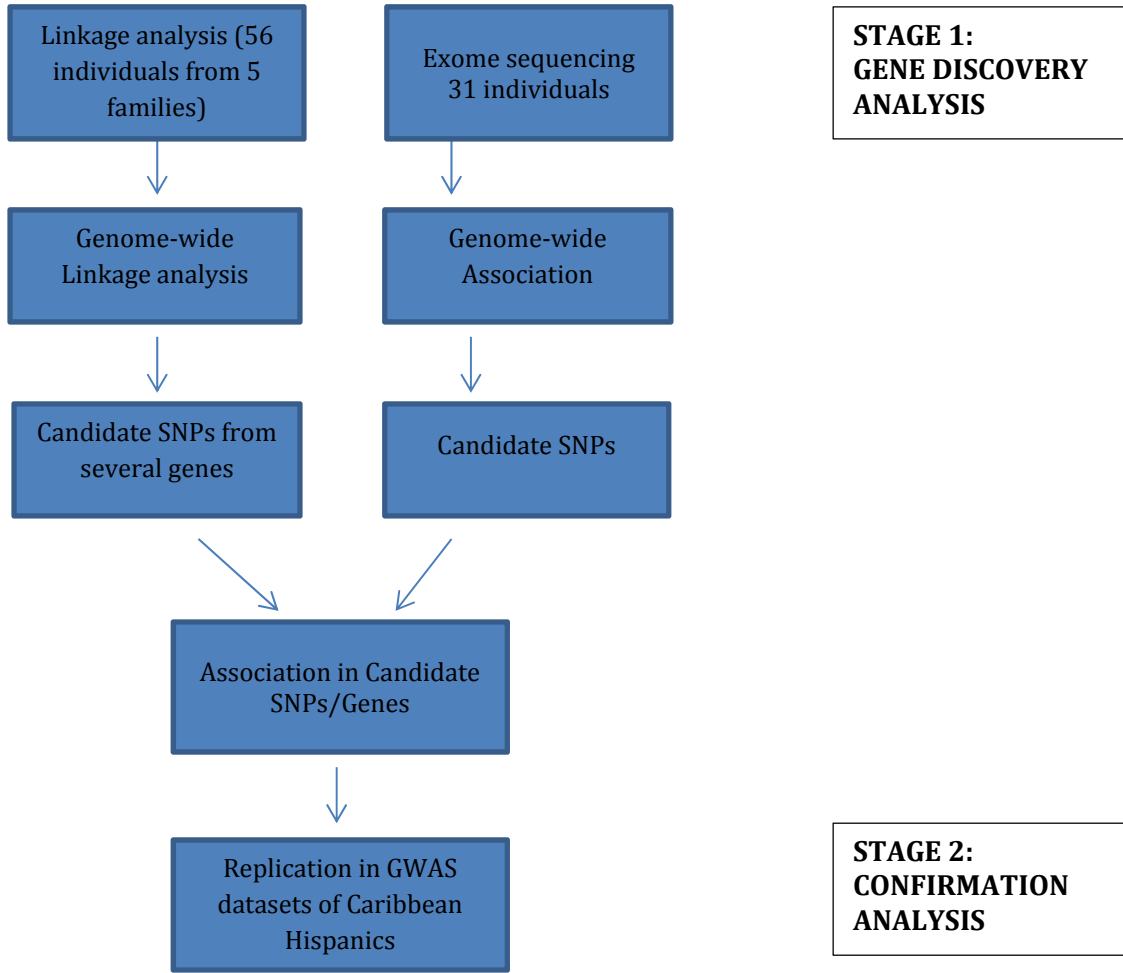

**eFigure 2.** Next-Generation Sequencing

## Variant calling pipeline

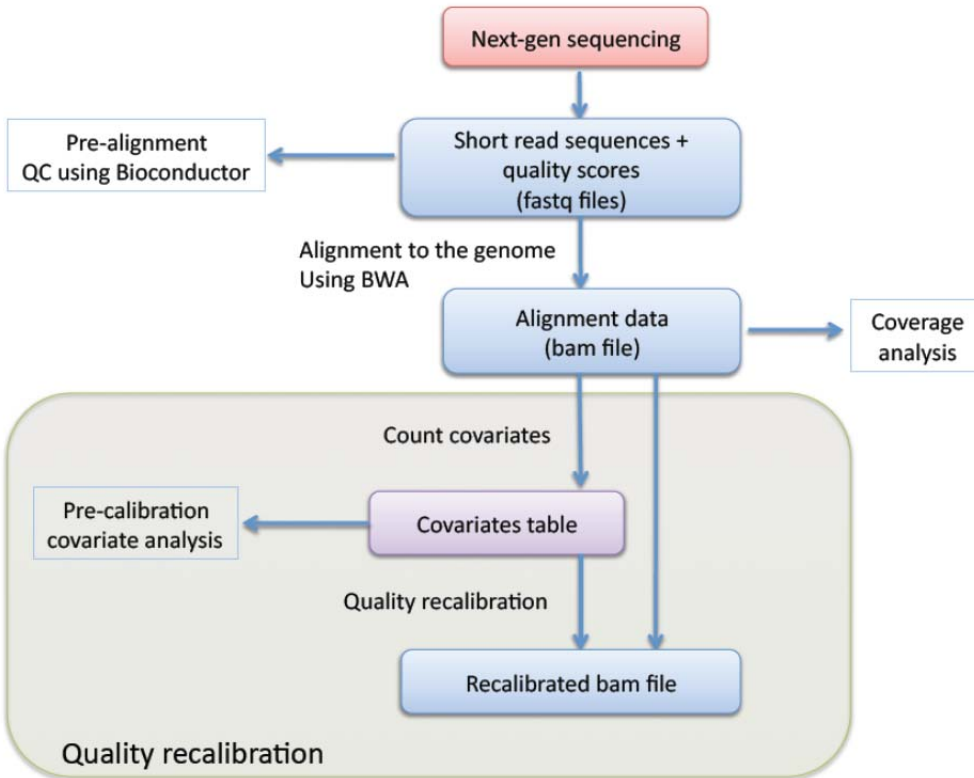

**eFigure 3.** LD Flanking the Variant From the Original Discovery Set for *SORBS2* and *SH3RF3*

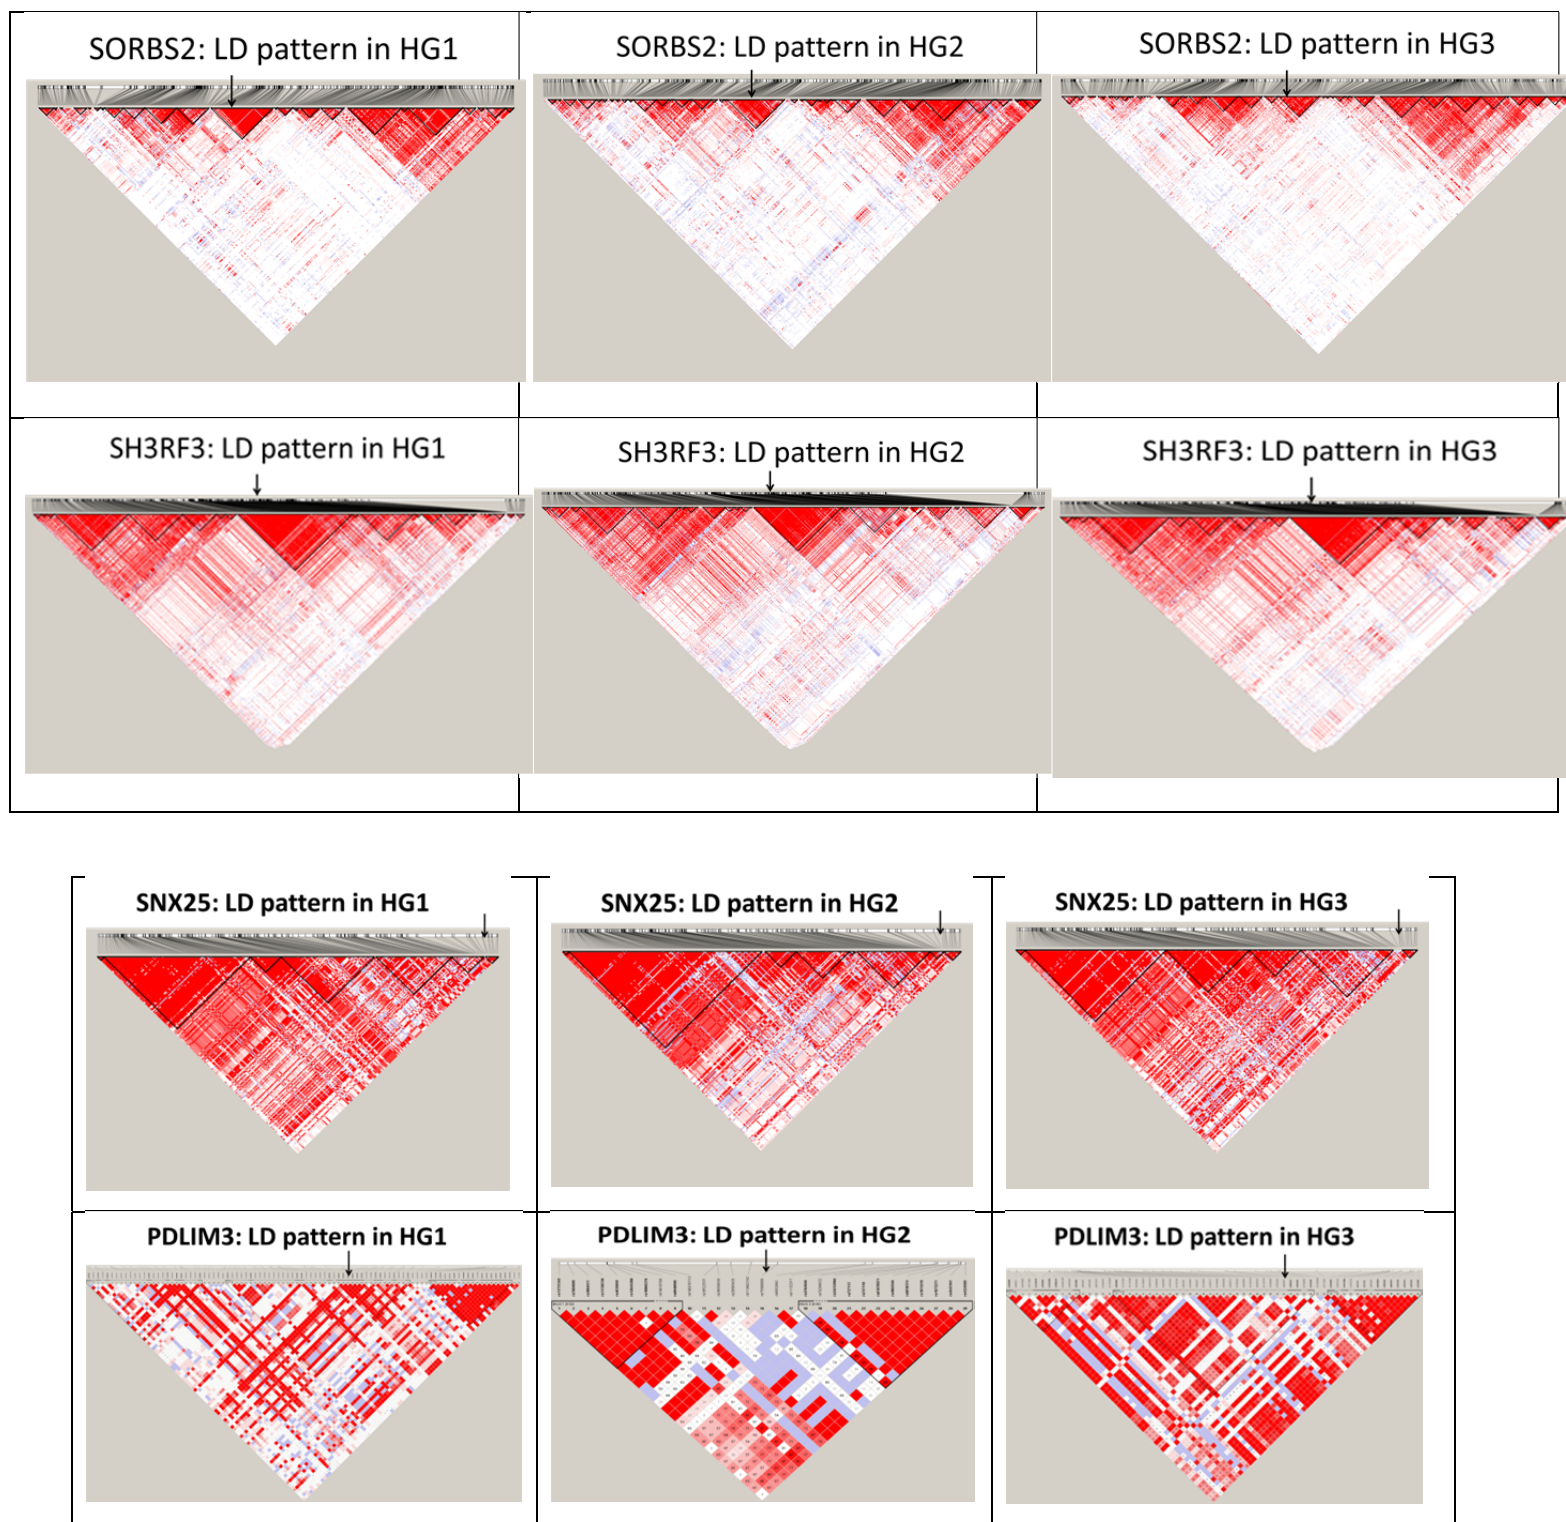

Supplement: NIHMS811612-supplement-2.pdf [file NIHMS811612-supplement-2.pdf]
